# Supplementary material for: Multi-modal, Multi-measure, and Multi-class Discrimination of ADHD with Hierarchical Feature Extraction and Extreme Learning Machine Using Structural and Functional Brain MRI
Source: PubMed Central journal article supplement (PMC5378777; doi:10.3389/fnhum.2017.00157), 2017-04-04
Supplement: Table1.pdf [file Table1.pdf]

## Supplementary Material

# Multi-modal, Multi-measure, and Multi-class Discrimination of ADHD with Hierarchical Feature Extraction and Extreme Learning Machine Using Structural and Functional Brain MRI

Muhammad Naveed Iqbal Qureshi <sup>1</sup>, Jooyoung Oh <sup>1</sup>, Beomjun Min <sup>2</sup>, Hang Joon Jo <sup>3</sup>, and Boreom Lee<sup>1\*</sup>

<sup>1</sup>Department of Biomedical Science and Engineering, Institute of Integrated Technology, Gwangju Institute of Science and Technology, Gwangju, Korea, <sup>2</sup>Department of Neuropsychiatry, Seoul National University Hospital, Seoul, Korea, <sup>3</sup>Department of Neurologic Surgery, Mayo Clinic, Rochester, Minnesota, USA

**\* Correspondence:**

Boreom Lee

[leebr@gist.ac.kr](mailto:leebr@gist.ac.kr), Phone: +82-62-715-3272, Fax: +82-62-715-3244

## 1 Supplementary Tables

**Table S-I. Anatomical name and indices of all the atlas-ROI based features**

| Feature Measure                | fMRI  |    | C-Thickness |     | C-Area  |     | C-Volume |     | C-Curvature |     | C-Thick-SD |     | Sub-C Volume |    | WM Volume |     | Intensity |    | Volume all |    |   |
|--------------------------------|-------|----|-------------|-----|---------|-----|----------|-----|-------------|-----|------------|-----|--------------|----|-----------|-----|-----------|----|------------|----|---|
| Indices                        | 1-102 |    | 103-166     |     | 167-230 |     | 231-292  |     | 293-354     |     | 355-416    |     | 417-453      |    | 454-521   |     | 522-561   |    | 562-577    |    |   |
| Hemisphere                     | lh    | rh | lh          | rh  | lh      | rh  | lh       | rh  | lh          | rh  | lh         | rh  | lh           | rh | lh        | rh  | lh        | rh | lh         | rh |   |
| Anatomical Region              |       |    |             |     |         |     |          |     |             |     |            |     |              |    |           |     |           |    |            |    |   |
| Banks superior temporal sulcus | 1     | 35 | -           | -   | -       | -   | -        | -   | -           | -   | -          | -   | -            | -  | -         | 454 | 488       | -  | -          | -  | - |
| Caudal anterior cingulate      | 2     | 36 | 103         | 135 | 167     | 199 | 231      | 262 | 293         | 324 | 355        | 386 | -            | -  | 455       | 489 | -         | -  | -          | -  |   |
| Caudal middle frontal gyrus    | 3     | 37 | 104         | 136 | 168     | 200 | 232      | 263 | 294         | 325 | 356        | 387 | -            | -  | 456       | 490 | -         | -  | -          | -  |   |
| Cuneus                         | 4     | 38 | 105         | 137 | 169     | 201 | 233      | 264 | 295         | 326 | 357        | 388 | -            | -  | 457       | 491 | -         | -  | -          | -  |   |
| Entorhinal cortex              | 5     | 39 | 106         | 138 | 170     | 202 | 234      | 265 | 296         | 327 | 358        | 389 | -            | -  | 458       | 492 | -         | -  | -          | -  |   |
| Fusiform gyrus                 | 6     | 40 | 107         | 139 | 171     | 203 | 235      | 266 | 297         | 328 | 359        | 390 | -            | -  | 459       | 493 | -         | -  | -          | -  |   |

## Supplementary Material

| Feature Measure             | fMRI  |    | C-Thickness |     | C-Area  |     | C-Volume |     | C-Curvature |     | C-Thick-SD |     | Sub-C Volume |    | WM Volume |     | Intensity |    | Volume all |    |
|-----------------------------|-------|----|-------------|-----|---------|-----|----------|-----|-------------|-----|------------|-----|--------------|----|-----------|-----|-----------|----|------------|----|
| Indices                     | 1-102 |    | 103-166     |     | 167-230 |     | 231-292  |     | 293-354     |     | 355-416    |     | 417-453      |    | 454-521   |     | 522-561   |    | 562-577    |    |
| Hemisphere                  | lh    | rh | lh          | rh  | lh      | rh  | lh       | rh  | lh          | rh  | lh         | rh  | lh           | rh | lh        | rh  | lh        | rh | lh         | rh |
| Anatomical Region           |       |    |             |     |         |     |          |     |             |     |            |     |              |    |           |     |           |    |            |    |
| Inferior parietal lobule    | 7     | 41 | 108         | 140 | 172     | 204 | 236      | 267 | 298         | 329 | 360        | 391 | -            | -  | 460       | 494 | -         | -  | -          | -  |
| Inferior temporal gyrus     | 8     | 42 | 109         | 141 | 173     | 205 | 237      | 268 | 299         | 330 | 361        | 392 | -            | -  | 461       | 495 | -         | -  | -          | -  |
| Isthmus cingulate           | 9     | 43 | 110         | 142 | 174     | 206 | 238      | 269 | 300         | 331 | 362        | 393 | -            | -  | 462       | 496 | -         | -  | -          | -  |
| Lateral occipital cortex    | 10    | 44 | 111         | 143 | 175     | 207 | 239      | 270 | 301         | 332 | 363        | 394 | -            | -  | 463       | 497 | -         | -  | -          | -  |
| Lateral orbitofrontal gyrus | 11    | 45 | 112         | 144 | 176     | 208 | 240      | 271 | 302         | 333 | 364        | 395 | -            | -  | 464       | 498 | -         | -  | -          | -  |
| Lingual gyrus               | 12    | 46 | 113         | 145 | 177     | 209 | 241      | 272 | 303         | 334 | 365        | 396 | -            | -  | 465       | 499 | -         | -  | -          | -  |
| Medial orbitofrontal gyrus  | 13    | 47 | 114         | 146 | 178     | 210 | 242      | 273 | 304         | 335 | 366        | 397 | -            | -  | 466       | 500 | -         | -  | -          | -  |
| Middle temporal gyrus       | 14    | 48 | 115         | 147 | 179     | 211 | 243      | 274 | 305         | 336 | 367        | 398 | -            | -  | 467       | 501 | -         | -  | -          | -  |
| Parahippocampal gyrus       | 15    | 49 | 116         | 148 | 180     | 212 | 244      | 275 | 306         | 337 | 368        | 399 | -            | -  | 468       | 502 | -         | -  | -          | -  |
| Paracentral gyrus           | 16    | 50 | 117         | 149 | 181     | 213 | 245      | 276 | 307         | 338 | 369        | 400 | -            | -  | 469       | 503 | -         | -  | -          | -  |
| Pars opercularis (IFG)      | 17    | 51 | 118         | 150 | 182     | 214 | 246      | 277 | 308         | 339 | 370        | 401 | -            | -  | 470       | 504 | -         | -  | -          | -  |
| Pars orbitalis (IFG)        | 18    | 52 | 119         | 151 | 183     | 215 | 247      | 278 | 309         | 340 | 371        | 402 | -            | -  | 471       | 505 | -         | -  | -          | -  |
| Pars triangularis (IFG)     | 19    | 53 | 120         | 152 | 184     | 216 | 248      | 279 | 310         | 341 | 372        | 403 | -            | -  | 472       | 506 | -         | -  | -          | -  |
| Pericalcarine cortex        | 20    | -  | 121         | 153 | 185     | 217 | 249      | 280 | 311         | 342 | 373        | 404 | -            | -  | 473       | 507 | -         | -  | -          | -  |
| Postcentral gyrus           | 21    | 54 | 122         | 154 | 186     | 218 | 250      | 281 | 312         | 343 | 374        | 405 | -            | -  | 474       | 508 | -         | -  | -          | -  |
| Posterior cingulate gyrus   | 22    | 55 | 123         | 155 | 187     | 219 | 251      | 282 | 313         | 344 | 375        | 406 | -            | -  | 475       | 509 | -         | -  | -          | -  |
| Precentral gyrus            | 23    | 56 | 124         | 156 | 188     | 220 | 252      | 283 | 314         | 345 | 376        | 407 | -            | -  | 476       | 510 | -         | -  | -          | -  |
| Precuneus                   | 24    | 57 | 125         | 157 | 189     | 221 | 253      | 284 | 315         | 346 | 377        | 408 | -            | -  | 477       | 511 | -         | -  | -          | -  |
| Rostral anterior cingulate  | 25    | 58 | 126         | 158 | 190     | 222 | 254      | 285 | 316         | 347 | 378        | 409 | -            | -  | 478       | 512 | -         | -  | -          | -  |
| Rostral middle frontal      | 26    | 59 | 127         | 159 | 191     | 223 | 255      | 286 | 317         | 348 | 379        | 410 | -            | -  | 479       | 513 | -         | -  | -          | -  |
| Ssuperior frontal           | 27    | 60 | 128         | 160 | 192     | 224 | 256      | 287 | 318         | 349 | 380        | 411 | -            | -  | 480       | 514 | -         | -  | -          | -  |
| Superior parietal lobule    | 28    | 61 | 129         | 161 | 193     | 225 | 257      | 288 | 319         | 350 | 381        | 412 | -            | -  | 481       | 515 | -         | -  | -          | -  |
| Superior temporal gyrus     | 29    | 62 | 130         | 162 | 194     | 226 | 258      | 289 | 320         | 351 | 382        | 413 | -            | -  | 482       | 516 | -         | -  | -          | -  |
| Supramarginal gyrus         | 30    | 63 | 131         | 163 | 195     | 227 | 259      | 290 | 321         | 352 | 383        | 414 | -            | -  | 483       | 517 | -         | -  | -          | -  |
| Frontal pole                | 31    | 64 | -           | -   | -       | -   | -        | -   | -           | -   | -          | -   | -            | -  | 484       | 518 | -         | -  | -          | -  |
| Temporal pole               | 32    | 65 | -           | -   | -       | -   | -        | -   | -           | -   | -          | -   | -            | -  | 485       | 519 | -         | -  | -          | -  |
| Transverse temporal gyrus   | 33    | 66 | 132         | 164 | 196     | 228 | 260      | 291 | 322         | 353 | 384        | 415 | -            | -  | 486       | 520 | -         | -  | -          | -  |

| Feature Measure            | fMRI  |    | C-Thickness |     | C-Area  |     | C-Volume |     | C-Curvature |     | C-Thick-SD |     | Sub-C Volume |     | WM Volume |     | Intensity |     | Volume all |    |
|----------------------------|-------|----|-------------|-----|---------|-----|----------|-----|-------------|-----|------------|-----|--------------|-----|-----------|-----|-----------|-----|------------|----|
| Indices                    | 1-102 |    | 103-166     |     | 167-230 |     | 231-292  |     | 293-354     |     | 355-416    |     | 417-453      |     | 454-521   |     | 522-561   |     | 562-577    |    |
| Hemisphere                 | lh    | rh | lh          | rh  | lh      | rh  | lh       | rh  | lh          | rh  | lh         | rh  | lh           | rh  | lh        | rh  | lh        | rh  | lh         | rh |
| Anatomical Region          |       |    |             |     |         |     |          |     |             |     |            |     |              |     |           |     |           |     |            |    |
| Insula                     | 34    | 67 | 133         | 165 | 197     | 229 | 261      | 292 | 323         | 354 | 385        | 416 | -            | -   | 487       | 521 | -         | -   | -          | -  |
| Mean Thickness             | -     | -  | 134         | 166 | -       | -   | -        | -   | -           | -   | -          | -   | -            | -   | -         | -   | -         | -   | -          | -  |
| White Surface Area         | -     | -  | -           | -   | 198     | 230 | -        | -   | -           | -   | -          | -   | -            | -   | -         | -   | -         | -   | -          | -  |
| Cerebral White Matter      | 68    | 84 | -           | -   | -       | -   | -        | -   | -           | -   | -          | -   | -            | -   | -         | -   | -         | -   | -          | -  |
| Lateral Ventricle          | 69    | 85 | -           | -   | -       | -   | -        | -   | -           | -   | -          | -   | 417          | 434 | -         | -   | 522       | 540 | -          | -  |
| Inferior Lateral Ventricle | -     | -  | -           | -   | -       | -   | -        | -   | -           | -   | -          | -   | 418          | 435 | -         | -   | 523       | 541 | -          | -  |
| Cerebellum White Matter    | 70    | 86 | -           | -   | -       | -   | -        | -   | -           | -   | -          | -   | 419          | 436 | -         | -   | 524       | 542 | -          | -  |
| Cerebellum Cortex          | 71    | 87 | -           | -   | -       | -   | -        | -   | -           | -   | -          | -   | 420          | 437 | -         | -   | 525       | 543 | -          | -  |
| Thalamus Proper            | 72    | 88 | -           | -   | -       | -   | -        | -   | -           | -   | -          | -   | 421          | 438 | -         | -   | 526       | 544 | -          | -  |
| Caudate                    | 73    | 89 | -           | -   | -       | -   | -        | -   | -           | -   | -          | -   | 422          | 439 | -         | -   | 527       | 545 | -          | -  |
| Putamen                    | 74    | 90 | -           | -   | -       | -   | -        | -   | -           | -   | -          | -   | 423          | 440 | -         | -   | 528       | 546 | -          | -  |
| Pallidum                   | 75    | 91 | -           | -   | -       | -   | -        | -   | -           | -   | -          | -   | 424          | 441 | -         | -   | 529       | 547 | -          | -  |
| 3rd-Ventricle              | 76    | -  | -           | -   | -       | -   | -        | -   | -           | -   | -          | -   | 425          | -   | -         | -   | 530       | -   | -          | -  |
| 4th-Ventricle              | 77    | -  | -           | -   | -       | -   | -        | -   | -           | -   | -          | -   | 426          | -   | -         | -   | 531       | -   | -          | -  |
| Brain-Stem                 | 78    | -  | -           | -   | -       | -   | -        | -   | -           | -   | -          | -   | 427          | -   | -         | -   | 532       | -   | -          | -  |
| Hippocampus                | 79    | 92 | -           | -   | -       | -   | -        | -   | -           | -   | -          | -   | 428          | 442 | -         | -   | 533       | 548 | -          | -  |
| Amygdala                   | 80    | 93 | -           | -   | -       | -   | -        | -   | -           | -   | -          | -   | 429          | 443 | -         | -   | 534       | 549 | -          | -  |
| CSF                        | -     | -  | -           | -   | -       | -   | -        | -   | -           | -   | -          | -   | 430          | -   | -         | -   | 535       | -   | -          | -  |
| Accumbens area             | 81    | 94 | -           | -   | -       | -   | -        | -   | -           | -   | -          | -   | 431          | 444 | -         | -   | 536       | -   | -          | -  |
| Ventral diencephalon       | 82    | 95 | -           | -   | -       | -   | -        | -   | -           | -   | -          | -   | 432          | 445 | -         | -   | 537       | -   | -          | -  |
| Vessel                     | -     | -  | -           | -   | -       | -   | -        | -   | -           | -   | -          | -   | -            | -   | -         | -   | 538       | -   | -          | -  |
| Choroid-plexus             | 83    | 96 | -           | -   | -       | -   | -        | -   | -           | -   | -          | -   | 433          | 446 | -         | -   | 539       | -   | -          | -  |
| WM hypointensities         | -     | -  | -           | -   | -       | -   | -        | -   | -           | -   | -          | -   | 447          | -   | -         | -   | 554       | -   | -          | -  |
| Non WM hypointensities     | -     | -  | -           | -   | -       | -   | -        | -   | -           | -   | -          | -   | -            | -   | -         | -   | 555       | -   | -          | -  |
| Optic Chiasm               | 97    | -  | -           | -   | -       | -   | -        | -   | -           | -   | -          | -   | 448          | -   | -         | -   | 556       | -   | -          | -  |
| Posterior CC               | 98    | -  | -           | -   | -       | -   | -        | -   | -           | -   | -          | -   | 449          | -   | -         | -   | 557       | -   | -          | -  |

| Feature Measure                 | fMRI  |    | C-Thickness |    | C-Area  |    | C-Volume |    | C-Curvature |    | C-Thick-SD |    | Sub-C Volume |     | WM Volume |    | Intensity |    | Volume all |    |         |
|---------------------------------|-------|----|-------------|----|---------|----|----------|----|-------------|----|------------|----|--------------|-----|-----------|----|-----------|----|------------|----|---------|
| Indices                         | 1-102 |    | 103-166     |    | 167-230 |    | 231-292  |    | 293-354     |    | 355-416    |    | 417-453      |     | 454-521   |    | 522-561   |    | 562-577    |    |         |
| Hemisphere                      | lh    | rh | lh          | rh | lh      | rh | lh       | rh | lh          | rh | lh         | rh | lh           | rh  | lh        | rh | lh        | rh | lh         | rh |         |
| Anatomical Region               |       |    |             |    |         |    |          |    |             |    |            |    |              |     |           |    |           |    |            |    |         |
| Middle Posterior CC             | 99    | -  | -           | -  | -       | -  | -        | -  | -           | -  | -          | -  | -            | 450 | -         | -  | 558       | -  | -          | -  | -       |
| Central CC                      | 100   | -  | -           | -  | -       | -  | -        | -  | -           | -  | -          | -  | -            | 451 | -         | -  | 559       | -  | -          | -  | -       |
| Middle Anterior CC              | 101   | -  | -           | -  | -       | -  | -        | -  | -           | -  | -          | -  | -            | 452 | -         | -  | 560       | -  | -          | -  | -       |
| Anterior CC                     | 102   | -  | -           | -  | -       | -  | -        | -  | -           | -  | -          | -  | -            | 453 | -         | -  | 561       | -  | -          | -  | -       |
| Brain Segment Volume            | -     | -  | -           | -  | -       | -  | -        | -  | -           | -  | -          | -  | -            | -   | -         | -  | -         | -  | -          | -  | 562     |
| Brain Segment Vol Not Ventricle | -     | -  | -           | -  | -       | -  | -        | -  | -           | -  | -          | -  | -            | -   | -         | -  | -         | -  | -          | -  | 563     |
| Brain Segment Vol Not Vent Surf | -     | -  | -           | -  | -       | -  | -        | -  | -           | -  | -          | -  | -            | -   | -         | -  | -         | -  | -          | -  | 564     |
| Cortex Vol                      | -     | -  | -           | -  | -       | -  | -        | -  | -           | -  | -          | -  | -            | -   | -         | -  | -         | -  | -          | -  | 565 566 |
| Whole Cortex Vol                | -     | -  | -           | -  | -       | -  | -        | -  | -           | -  | -          | -  | -            | -   | -         | -  | -         | -  | -          | -  | 567     |
| Cortical White Matter Vol       | -     | -  | -           | -  | -       | -  | -        | -  | -           | -  | -          | -  | -            | -   | -         | -  | -         | -  | -          | -  | 568 569 |
| Whole Cortical White Matter Vol | -     | -  | -           | -  | -       | -  | -        | -  | -           | -  | -          | -  | -            | -   | -         | -  | -         | -  | -          | -  | 570     |
| Sub-Cortical Gray Vol           | -     | -  | -           | -  | -       | -  | -        | -  | -           | -  | -          | -  | -            | -   | -         | -  | -         | -  | -          | -  | 571     |
| Total Gray Vol                  | -     | -  | -           | -  | -       | -  | -        | -  | -           | -  | -          | -  | -            | -   | -         | -  | -         | -  | -          | -  | 572     |
| SupraTentorial Vol              | -     | -  | -           | -  | -       | -  | -        | -  | -           | -  | -          | -  | -            | -   | -         | -  | -         | -  | -          | -  | 573     |
| SupraTentorial Vol Not Vent     | -     | -  | -           | -  | -       | -  | -        | -  | -           | -  | -          | -  | -            | -   | -         | -  | -         | -  | -          | -  | 574     |
| SupraTentorial Vol Not Vent Vox | -     | -  | -           | -  | -       | -  | -        | -  | -           | -  | -          | -  | -            | -   | -         | -  | -         | -  | -          | -  | 575     |
| Brain Mask Volume               | -     | -  | -           | -  | -       | -  | -        | -  | -           | -  | -          | -  | -            | -   | -         | -  | -         | -  | -          | -  | 576     |
| Estimated Total ICV             | -     | -  | -           | -  | -       | -  | -        | -  | -           | -  | -          | -  | -            | -   | -         | -  | -         | -  | -          | -  | 577     |

**Abbreviation:** IFG = Inferior frontal gyrus; WM = white matter; CC = corpus callosum; ICV = intra cranial volume; CSF = cerebro-spinal fluid; WM = white matter; C = cortical; SD = standard deviation. Complete feature vector of all the multimodal and multi-measure features includes the ANOVA-ROI based features in addition to the atlas-ROI based features. ANOVA-ROI based features were concatenated after the 577 atlas-ROI based features, such that:

598 (all feature vector) = 577 (atlas-ROI based) + 9 (fMRI-ANOVA ROI) + 12 (sMRI-ANOVA ROI)

**Table S-II. Significant features for acquiring the highest discrimination from each of the binary group**

| Subgroup |                             | ADHDC-ADHDI |           | ADHDI-TDC |           | ADHDC-TDC |           |
|----------|-----------------------------|-------------|-----------|-----------|-----------|-----------|-----------|
| No       | Name                        | Measure     | Frequency | Measure   | Frequency | Measure   | Frequency |
| 1        | Caudal anterior cingulate   | T, TS       | 3         | T         | 2         | T         | 1         |
| 2        | Caudal middle frontal gyrus | T           | 2         | T         | 1         | -         | -         |
| 3        | Entorhinal cortex           | T, TS       | 4         | T,TS      | 3         | -         | -         |
| 4        | Fusiform gyrus              | T           | 2         | T         | 2         | -         | -         |
| 5        | Inferior parietal lobule    | T           | 2         | T         | 1         | -         | -         |
| 6        | Inferior temporal gyrus     | T, TS       | 4         | T         | 2         | -         | -         |
| 7        | Isthmus cingulate           | T, TS       | 4         | T,TS      | 3         | -         | -         |
| 8        | Lateral orbitofrontal gyrus | T, TS       | 4         | T         | 2         | -         | -         |
| 9        | Medial orbitofrontal gyrus  | T, TS       | 4         | T         | 2         | -         | -         |
| 10       | Middle temporal gyrus       | T           | 2         | T         | 2         | T         | 2         |
| 11       | Parahippocampal gyrus       | T           | 2         | T         | 2         | -         | -         |
| 12       | Paracentral gyrus           | T           | 2         | T         | 1         | -         | -         |
| 13       | Pars opercularis (IFG)      | T           | 2         | T         | 2         | -         | -         |
| 14       | Pars orbitalis (IFG)        | T           | 2         | T         | 2         | -         | -         |
| 15       | Pars triangularis (IFG)     | T           | 2         | T         | 2         | -         | -         |
| 16       | Posterior cingulate         | T, TS       | 4         | T         | 2         | -         | -         |
| 17       | Precentral gyrus            | T           | 2         | -         | -         | -         | -         |
| 18       | Precuneus gyrus             | T           | 2         | -         | -         | -         | -         |
| 19       | Rostral anterior cingulate  | T           | 2         | T         | 2         | T         | 2         |
| 20       | Rostral middle frontal      | T           | 2         | -         | -         | -         | -         |
| 21       | Superior frontal            | T,V,WM      | 6         | T,V,WM    | 6         | V,WM      | 4         |
| 22       | Superior parietal lobule    | T           | 1         | -         | -         | -         | -         |
| 23       | Superior temporal gyrus     | T           | 2         | T         | 2         | T         | 2         |
| 24       | Supramarginal gyrus         | T           | 2         | T         | 2         | -         | -         |
| 25       | Transverse temporal gyrus   | T           | 2         | -         | -         | -         | -         |
| 26       | Insula                      | T, TS       | 4         | T         | 2         | T         | 2         |

| Subgroup |                                   | ADHDC-ADHDI |           | ADHDI-TDC |           | ADHDC-TDC |           |
|----------|-----------------------------------|-------------|-----------|-----------|-----------|-----------|-----------|
| No       | Name                              | Measure     | Frequency | Measure   | Frequency | Measure   | Frequency |
| 27       | Mean thickness of cortex          | T           | 2         | -         | -         | -         | -         |
| 28       | White surf area                   | A           | 2         | A         | 2         | A         | 2         |
| 29       | Cerebellum cortex                 | SV          | 2         | SV        | 2         | SV        | 2         |
| 30       | Cerebellum white matter           | I           | 2         | I         | 2         | I         | 2         |
| 31       | Thalamus proper                   | I           | 2         | I         | 2         | I         | 2         |
| 32       | Caudate                           | I           | 2         | I         | 2         | -         | -         |
| 33       | Putamen                           | I           | 2         | I         | 2         | -         | -         |
| 34       | Pallidum                          | I           | 2         | I         | 2         | I         | 2         |
| 35       | Brain-stem                        | I           | 1         | I         | 1         | I         | 1         |
| 36       | Hippocampus                       | I           | 2         | -         | -         | -         | -         |
| 37       | Amygdala                          | I           | 1         | -         | -         | -         | -         |
| 38       | Accumbens area                    | I           | 2         | -         | -         | -         | -         |
| 39       | Ventral diencephalon              | I           | 2         | I         | 2         | I         | 2         |
| 40       | WM hypointensities                | I           | 1         | I         | 1         | -         | -         |
| 41       | Non WM hypointensities            | I           | 1         | -         | -         | -         | -         |
| 42       | Optic chiasm                      | I           | 1         | I         | 1         | -         | -         |
| 43       | Posterior CC                      | I           | 1         | I         | 1         | I         | 1         |
| 44       | Middle posterior CC               | I           | 1         | I         | 1         | I         | 1         |
| 45       | Central CC                        | I           | 1         | I         | 1         | I         | 1         |
| 46       | Middle anterior CC                | I           | 1         | I         | 1         | I         | 1         |
| 47       | Anterior CC                       | I           | 1         | I         | 1         | I         | 1         |
| 48       | Brain segment volume              | VA          | 1         | -         | -         | -         | -         |
| 49       | Brain segment vol not vent        | VA          | 1         | -         | -         | -         | -         |
| 50       | Brain seg vol not vent surf       | VA          | 1         | -         | -         | -         | -         |
| 51       | Supratentorial volume             | VA          | 1         | -         | -         | -         | -         |
| 52       | Supratentorial vol not vent       | VA          | 1         | -         | -         | -         | -         |
| 53       | Supratentorial volume voxel count | VA          | 1         | -         | -         | -         | -         |
| 54       | Brain Mask volume                 | VA          | 1         | VA        | 1         | VA        | 1         |
| 55       | Estimated total ICV               | VA          | 1         | VA        | 1         | VA        | 1         |

**Abbreviation:** IFG = Inferior frontal gyrus; WM = white matter; CC = corpus callosum; ICV = intra cranial volume; T = mean cortical thickness; TS = cortical thickness standard deviation; V = cortical volume; A = cortical surface area; SV = sub-cortical volume; I = intensity; VA = overall volume
